# Supplementary material for: Earliest evidence for fruit consumption and potential seed dispersal by birds
Source: eLife. 2022 Aug 16;11:e74751. doi: 10.7554/eLife.74751 (PMC9381037; doi:10.7554/eLife.74751)
Supplement: Figure 2—source data 3. [file elife-74751-fig2-data3.csv]

	Eucliedean distance from Jeholornis mandible
Jeholornis_prima_STM_3-8	0	Jeholornis
Vultur_gryphus_NHMUK_S1955.5.11	0.091252326	Carnivory
Calandrella_cinerea_NHMUK_S1961.13.34	0.09385626	SeedGas
Podica_senegalensis_UMZC_209A_	0.106520494	Omnivory
Poecile_atricapillis_FMNH_504323	0.108466047	Omnivory
Crax_mitu_FMNH_320386	0.108490288	Fruit
Balearica_pavonina_NHMUK_1859.10.26.5_ROGER	0.10891358	Omnivory
Jacana_jacana_NHMUK_S_1990.2.5	0.108921065	Omnivory
Numida_meleagris_FMNH_390428	0.109293032	SeedGas
Caracara_cheriway_UMMZ_133664	0.109652817	Carnivory
Picus_viridis_NHMUK_NHMUK_S1982.5.1	0.109788988	Grabbing/pecking_invertebrates
Chauna_chavaria_OUMNH_23790	0.111898211	Omnivory
Pedionomus_torquatus_NHMUK_A1970.12.1	0.11309555	SeedGas
Burhinus_senegalensis_FMNH_313704	0.113800833	Grabbing/pecking_invertebrates
Psophia_crepitans_FMNH_105783	0.114073649	Fruit
Rollulus_rouloul_NHMUK_1871.7.20.87	0.114364177	Omnivory
Chunga_burmeisteri_FMNH_106731	0.114417569	Omnivory
Pterocles_quadricinctus FMNH 319937	0.114442984	SeedGas
Regulus_ignicapillus_NHMUK_S1952.2.662_	0.114485942	Grabbing/pecking_invertebrates
Charadris_vociferus_FMNH_470173	0.114790898	Grabbing/pecking_invertebrates
Cariama_cristata_FMNH_105653	0.114969249	Grabbing/pecking_invertebrates
Choriotis_kori_UMMZ_210444	0.11579787	Omnivory
Cathartes_burrovianus_UMMZ_227466	0.115904494	Carnivory
Anseranas semipalmata NHMUK 1852.7.22.1	0.117365906	SeedGas
Colius_striatus_FMNH_384817	0.117614777	Fruit
Jynx_torquilla_NHMUK_s1986.36.10	0.117935986	Grabbing/pecking_invertebrates
Bonasa_umbellus_FMNH_348972	0.118403401	Fruit
Opisthocomus_hoazin_NHMUK_S1961.6.1	0.118649118	Fruit
Glareola_pratincola_FMNH_368875	0.119837451	Grabbing/pecking_invertebrates
Turnix_varius_NHMUK_S1952.2.142	0.120007859	Omnivory
Rallus_limnicola_FMNH_501812	0.120543795	Omnivory
Phaethon_lepturus_NHMUK_1876.3.16.3	0.121176345	Piscivory
Ortalis_ruficauda_UMMZ_155489	0.122420642	Fruit
Sterna_hirundo_NHMUK_NHMUK_S_1975.65.4	0.122996336	Piscivory
Eurypyga_helias_FMNH_317341	0.123310112	Omnivory
Sylvia_borin_FMNH_385185	0.124074472	Omnivory
Menura_novaehollandiae_FMNH_336751	0.12435726	Grabbing/pecking_invertebrates
Climacteris_melanura_UMMZ_214303	0.125120755	Grabbing/pecking_invertebrates
Treron_capellei_UMMZ_220454	0.125187317	Fruit
Pandion_haliaetus_FMNH_437336	0.125343677	Piscivory
Rupicola_peruviana_UMMZ_119210	0.125586852	Fruit
Ixobrychus_minutus_NHMUK_S_2007_61.1_	0.125637006	Grabbing/pecking_invertebrates
Tyto_alba_NHMUK_S1989.22.1_	0.125689964	Carnivory
Arenaria_interpres_FMNH_313992	0.125756642	Grabbing/pecking_invertebrates
Diomedea_irrorata_NHMUK_S1963.28.4	0.126006668	Piscivory
Micrastur_ruficollis_FMNH_330226	0.126052611	Carnivory
Indicator_exilis_FMNH_429726	0.126146459	Nectarivory
Ectopistes_migratorius_UMMZ_alcohol	0.126211173	SeedGas
Turdus_olivater_FMNH_319675	0.128129917	Omnivory
Colius_macrourus_FMNH_368959_	0.128536659	Fruit
Strix_aluco_NHMUK_S2001.38	0.128636111	Carnivory
Myrmothera_campanisona_FMNH_322348	0.128645211	Grabbing/pecking_invertebrates
Buteo_rufofuscus_NHMUK_1862.1.18.1	0.12974245	Carnivory
Capito_niger_FMNH_321049	0.130223814	Fruit
Larus_novae-hollandiae_UMZC_274.C_	0.130521844	Omnivory
Anser_fabalis_NHMUK_1895.2.6.9_	0.130556085	SeedGas
Colinus_virginianus_FMNH_105065	0.132004332	SeedGas
Corythaeota_cristata_FMNH_313066	0.132122947	Fruit
Columba_palumbus_UMZC_409A_	0.132170113	SeedGas
Puffinus_tenuirostris_NHMUK_1850.8.15.152	0.132507271	Piscivory
Tyrannus_tyrannus_FMNH_487521	0.133659802	Grabbing/pecking_invertebrates
Malurus_melanocephalus_UMMZ_224775	0.133860564	Grabbing/pecking_invertebrates
Eudromia_elegans_UMMZ_156966	0.134379126	SeedGas
Hymenops_persipicillata_UMMZ_158790	0.134895262	Grabbing/pecking_invertebrates
Sagittarius_serpentarius_NHMUK_1898.5.7.1	0.136196313	Carnivory
Porphyrio_poliocephalus_NHMUK_S1952.1.93	0.13783732	Grabbing/pecking_invertebrates
Pelecanoides_urinatrix_NHMUK_S2006.1.14	0.138002816	Piscivory
Scopus_umbretta_FMNH_313701_	0.138497726	Carnivory
Grus_leucogeranus_UMZC_344D	0.13884155	Omnivory
Manucodia_chalybatus_UMZC_436.K	0.138866629	Fruit
Hirundinea_bellicosa_UMMZ_200850	0.139352521	Grabbing/pecking_invertebrates
Ardea_alba_UMZC_338H	0.139966302	Piscivory
Accipiter_nisus_NHMUK_S1982.149.1	0.140426665	Carnivory
Odontophorous_guttatus_UMMZ_210631	0.140585684	SeedGas
Dendrocygna_bicolor_UMMZ_219885_	0.140837944	SeedGas
Spizella_arborea_NHMUK_1986.60.60_2	0.140988185	SeedBeak-Finch
Tigrisoma_lineatum_FMNH_105528	0.14117108	Grabbing/pecking_invertebrates
Gavia_stellata_NHMUK 1891.7.20.132	0.141319738	Piscivory
Rollandia_rollandia_UMMZ_156975	0.141572796	Piscivory
Oceanodroma_leucorhoa_NHMUK_S1953.3.10	0.142312985	Piscivory
Ptilonorhynchus_violaceus_UMMZ_155483	0.142680243	Omnivory
Monias_benschi_NHMUK_1924.11.29.1	0.142682911	Grabbing/pecking_invertebrates
Apaloderma_narino_FMNH_290897_	0.143519959	Grabbing/pecking_invertebrates
Pelagodroma_marina_NHMUK_1895.7.1.163_ALL	0.146071878	Piscivory
Melanopareia_torquata_FMNH_335140	0.146163476	Grabbing/pecking_invertebrates
Sula_dactylatra_NHMUK_1890.11.3.10	0.146282055	Piscivory
Rostratula_benghalensis_FMNH_319933	0.147081868	Probing_invertebrates
Elaenia_flavogaster_FMNH_394495	0.147346114	Omnivory
Columbina_minuta_FMNH_289160	0.147361679	SeedGas
Pipra_erythrocephala_UMMZ_157210	0.147991298	Fruit
Leptoptilos_crumeniferus_NHMUK_S_1952.3.182	0.149173029	Carnivory
Pycnonotus_caffer_NHMUK_S1986.75.18_01	0.149291189	Omnivory
Corvus_brachyrhynchos_FMNH_441515_	0.149950508	Omnivory
Ptilinopus_lechlancheri_FMNH_358261	0.15250372	Fruit
Chelidoptera_tenebrosa_YPM_114404	0.152569264	Grabbing/pecking_invertebrates
Archilochus_colubris_FMNH_484738	0.152641843	Nectarivory
Falco_sparverius_UMMZ_154452	0.152644089	Carnivory
Falco_sparverius_UMMZ_154462	0.152644089	Carnivory
Alcedo_atthis_NHMUK_S_1994.7.1	0.154101807	Piscivory
Phalacrocorax_albiventer_NHMUK_S_2012.36.1	0.154115398	Piscivory
Chloropipio_holochlora_FMNH_288169	0.154158435	Grabbing/pecking_invertebrates
Fregata_aquila_NHMUK_1890.11.3.3	0.154943157	Piscivory
Tityra_semifasciata_NHMUK_1891.7.20.15	0.155027579	Fruit
Myiobius_varbatus_FMNH_386812	0.15515271	Grabbing/pecking_invertebrates
Rhynchocyclus_olivaceus_FMNH_330600	0.155726967	Grabbing/pecking_invertebrates
Topaza_pyra_FMNH_318845	0.156326789	Nectarivory
Hemiprocne_comata_UMMZ_158224	0.156817646	Grabbing/pecking_invertebrates
Geospiza_fulginosa_NHMUK_A1975.15.25	0.157064623	SeedBeak-Finch
Acanthisitta_chloris_YPM_125219	0.157551913	Grabbing/pecking_invertebrates
Trogon_melanurus_FMNH_290496	0.15827117	Fruit
Leptotila_rufazilla_FMNH_318659	0.159158638	SeedGas
Anhinga_anhinga_FMNH_491374	0.160014774	Piscivory
Aythya_ferina_NMHUK_1851.12.23.15	0.1625588	SeedGas
Calyptomena_viridis_NHMUK_s1969.1.70	0.163891874	Fruit
Tringa_ochrophus_FMNH_368850	0.164699035	Probing_invertebrates
Crypturellus_tataupa_UMMZ_201948	0.164783075	Omnivory
Bucco_capensis_FMNH_330305	0.171385796	Carnivory
Piprites_chloris_FMNH_290398	0.171812509	Grabbing/pecking_invertebrates
Elanus_caerulenus_NHMUK_1850.8.15.159	0.173572686	Carnivory
Balaeniceps_rex_NHMUK_S1952.1.100	0.173746295	Piscivory
Myrmornis_torquata_YPM_106157	0.173870966	Grabbing/pecking_invertebrates
Cuculus_fugax_FMNH_357420	0.178276348	Grabbing/pecking_invertebrates
Psittrichas_fulgidus_YPM_141821	0.17846345	Fruit
Chaetura_brachyrua_UMMZ_157689	0.18033998	Grabbing/pecking_invertebrates
Momotus_momota_NHMUK_S_2105.23	0.181416686	Omnivory
Anas_discors_NHMUK_S2001.41.5	0.182499854	SeedGas
ParadoxornisTimalia_NHM1923.1.20.6_1945.14.1_2	0.183228352	SeedBeak-Finch
Caprimulgus_macrurus_FMNH_392245	0.183499672	Grabbing/pecking_invertebrates
Spheniscus_humboldti_NHMUK_S_2000.7.1	0.184500574	Piscivory
Pelecanus_occidentalis_NHMUK_S1973.66.16	0.184851317	Piscivory
Streptoprocne_zonaris_FMNH_85767	0.185065529	Grabbing/pecking_invertebrates
Limosa_lapponica_NHMUK_S_1994.46	0.187232275	Probing_invertebrates
Megalaima_chrysopogon_NHMUK_1850.8.15.28	0.189543866	Fruit
Terenura_spodioptila_FMNH_344009	0.19714906	Grabbing/pecking_invertebrates
Choloroceryle_amazona_UMMZ_209261	0.200310086	Piscivory
Coracias_benghalensis_NHMUK_S1987.19.15	0.200781867	Grabbing/pecking_invertebrates
Chordeiles_minor_UMMZ_233923	0.202078833	Grabbing/pecking_invertebrates
Chloris_chloris_OUMNH_24626	0.207567022	SeedBeak-Finch
Fringilla_coelebs_OUMNH_24647	0.208768055	Grabbing/pecking_invertebrates
Nyctibius_griseus_UMMZ_136371	0.21428531	Grabbing/pecking_invertebrates
Sclerurus_mexicanus_FMNH_321715	0.217317046	Grabbing/pecking_invertebrates
Haematopus_ostralegus_FMNH_363899	0.237393127	Probing_invertebrates
Aramus_guarauna_FMNH_376078	0.244646676	Probing_invertebrates
Galbula_dea_FMNH_376705_ALL_	0.253693513	Grabbing/pecking_invertebrates
Phoenicopterus_roseus_UMZC_346B_ALL	0.260582634	Omnivory
Psittacus_erithacus_NHMUK_S1992.41.60_	0.269083576	SeedBeak-Parrot
Bucorvus_abyssinicus_NHMUK_S2006.31.20_	0.269964538	Carnivory
Tockus_nasutus_NHMUK_S_1989.2.2	0.270631406	Grabbing/pecking_invertebrates
Phoeniculus_purpureus_FMNH_368956	0.271543343	Grabbing/pecking_invertebrates
Todus_mexicanus_FMNH_351174	0.274101188	Grabbing/pecking_invertebrates
Recurvirostra_avosetta_NHMUk_S1962.10	0.282345691	Probing_invertebrates
Rynchops_niger_FMNH_376309	0.314033698	Piscivory
Barnardius_zonarius_NHMUK_S_1983.5.1	0.325658881	SeedBeak-Parrot
Neodrepanis_coruscans_FMNH_363807	0.32740488	Nectarivory
Upupa_epops_FMNH_352821	0.328020836	Grabbing/pecking_invertebrates
Apteryx_australis_FMNH_391011	0.32942717	Probing_invertebrates
Deroptyus_accipitrinus_NHMUK_S2002.14.2	0.363880348	SeedBeak-Parrot
Rhamphastos_ambiguus_NHMUK_S2002.21	0.380663348	Fruit
Cornuropsis_carolinensis_UMMZ_68741	0.401065093	SeedBeak-Parrot
Probosciger_aterriumus_NHMUK_S2006.15.5	0.475270362	SeedBeak-Parrot
