# Supplementary material for: Earliest evidence for fruit consumption and potential seed dispersal by birds
Source: eLife. 2022 Aug 16;11:e74751. doi: 10.7554/eLife.74751 (PMC9381037; doi:10.7554/eLife.74751)
Supplement: Figure 2—source data 4. [file elife-74751-fig2-data4.csv]

	Eucliedean distance from Jeholornis cranium, excluding PC3
0 Jeholornis	0	Jeholornis
5 Manucodia_chalybatus	0.112649466	Fruit
Hymenops_persipicillata_UMMZ_158790	0.113605386	Grabbing/pecking_invertebrates
Pedionomus_torquatus_NHMUK_A1970.12.1	0.115492569	SeedGas
Melanopareia_torquata_FMNH_335140	0.115499391	Grabbing/pecking_invertebrates
Psophia_crepitans_FMNH_105783	0.122597973	Fruit
Acanthisitta_chloris_YPM_125219	0.123864921	Grabbing/pecking_invertebrates
Eudromia_elegans_UMMZ_156966	0.124607834	SeedGas
Malurus_melanocephalus_UMMZ_224775	0.124802358	Grabbing/pecking_invertebrates
Terenura_spodioptila_FMNH_344009	0.127457088	Grabbing/pecking_invertebrates
Myiobius_varbatus_FMNH_386812	0.12784997	Grabbing/pecking_invertebrates
Regulus_ignicapillus_NHMUK_S1952.2.662_	0.128869693	Grabbing/pecking_invertebrates
Myrmothera_campanisona_FMNH_322348	0.129306187	Grabbing/pecking_invertebrates
Sylvia_borin_FMNH_385185	0.130067488	Omnivory
Bucco_capensis_FMNH_330305	0.134090438	Carnivory
Crypturellus_tataupa_UMMZ_201948	0.1357547	Omnivory
Climacteris_melanura_UMMZ_214303	0.140910745	Grabbing/pecking_invertebrates
Pycnonotus_caffer_NHMUK_S1986.75.18_01	0.144373976	Plant-dominated_omnivory
Corvus_brachyrhynchos_FMNH_441515_	0.145128669	Animal-dominated_omnivory
Ptilonorhynchus_violaceus_UMMZ_155483	0.147837394	Omnivory
Pterocles_quadricinctus FMNH 319937	0.149089243	SeedGas
Burhinus_senegalensis_FMNH_313704	0.149247486	Grabbing/pecking_invertebrates
Turnix_varius_NHMUK_S1952.2.142	0.150472034	Plant-dominated_omnivory
Calandrella_cinerea_NHMUK_S1961.13.34	0.150527527	SeedGas
Rollandia_rollandia_UMMZ_156975	0.151843988	Piscivory
Chelidoptera_tenebrosa_YPM_114404	0.151949056	Grabbing/pecking_invertebrates
Hirundinea_bellicosa_UMMZ_200850	0.153742899	Grabbing/pecking_invertebrates
Cariama_cristata_FMNH_105653	0.155129391	Grabbing/pecking_invertebrates
5 Sapeornis	0.15551417	Mesozoic paraves
Porphyrio_poliocephalus_NHMUK_S1952.1.93	0.157122994	Grabbing/pecking_invertebrates
Charadris_vociferus_FMNH_470173	0.157958479	Grabbing/pecking_invertebrates
Pelecanoides_urinatrix_NHMUK_S2006.1.14	0.158222653	Piscivory
Arenaria_interpres_FMNH_313992	0.159304842	Grabbing/pecking_invertebrates
Chloropipio_holochlora_FMNH_288169	0.161364508	Grabbing/pecking_invertebrates
Glareola_pratincola_FMNH_368875	0.164937673	Grabbing/pecking_invertebrates
Chauna_chavaria_OUMNH_23790	0.166991993	Plant-dominated_omnivory
Numida_meleagris_FMNH_390428	0.167406107	SeedGas
Chunga_burmeisteri_FMNH_106731	0.167498412	Omnivory
3 Ectopistes_migratorius	0.16949995	SeedGas
Coracias_benghalensis_NHMUK_S1987.19.15	0.170016034	Grabbing/pecking_invertebrates
Columbina_minuta_FMNH_289160	0.170717795	SeedGas
4 Archaeopteryx	0.170947385	Mesozoic paraves
Elaenia_flavogaster_FMNH_394495	0.170982008	Animal-dominated_omnivory
Cuculus_fugax_FMNH_357420	0.173582815	Grabbing/pecking_invertebrates
Menura_novaehollandiae_FMNH_336751	0.173716638	Grabbing/pecking_invertebrates
Pandion_haliaetus_FMNH_437336	0.174557912	Piscivory
6 Pengornis	0.175113657	Mesozoic paraves
Myrmornis_torquata_YPM_106157	0.175439948	Grabbing/pecking_invertebrates
Podica_senegalensis_UMZC_209A_	0.176923501	Animal-dominated_omnivory
Spheniscus_humboldti_NHMUK_S_2000.7.1	0.177010245	Piscivory
Opisthocomus_hoazin_NHMUK_S1961.6.1	0.178434211	Fruit
Jacana_jacana_NHMUK_S_1990.2.5	0.180084519	Animal-dominated_omnivory
Rhynchocyclus_olivaceus_FMNH_330600	0.18027388	Grabbing/pecking_invertebrates
Pipra_erythrocephala_UMMZ_157210	0.180863489	Fruit
Sagittarius_serpentarius_NHMUK_1898.5.7.1	0.181199029	Carnivory
Jynx_torquilla_NHMUK_s1986.36.10	0.182450876	Grabbing/pecking_invertebrates
Tyrannus_tyrannus_FMNH_487521	0.183893425	Grabbing/pecking_invertebrates
Ptilinopus_lechlancheri_FMNH_358261	0.186044835	Fruit
Ortalis_ruficauda_UMMZ_155489	0.187110323	Fruit
Columba_palumbus_UMZC_409A_	0.187649677	SeedGas
Choriotis_kori_UMMZ_210444	0.187863109	Plant-dominated_omnivory
Turdus_olivater_FMNH_319675	0.188498095	Omnivory
Indicator_exilis_FMNH_429726	0.189544941	Nectarivory
Capito_niger_FMNH_321049	0.190078305	Fruit
Anseranas semipalmata NHMUK 1852.7.22.1	0.192339904	SeedGas
Leptotila_rufazilla_FMNH_318659	0.193831654	SeedGas
Piprites_chloris_FMNH_290398	0.194271621	Grabbing/pecking_invertebrates
Momotus_momota_NHMUK_S_2105.23	0.19442357	Animal-dominated_omnivory
Anser_fabalis_NHMUK_1895.2.6.9_	0.195270312	SeedGas
Alcedo_atthis_NHMUK_S_1994.7.1	0.198624372	Piscivory
Tityra_semifasciata_NHMUK_1891.7.20.15	0.199605666	Fruit
Rollulus_rouloul_NHMUK_1871.7.20.87	0.201428556	Omnivory
Fringilla_coelebs_OUMNH_24647	0.201839347	Grabbing/pecking_invertebrates
Poecile_atricapillis_FMNH_504323	0.202468055	Animal-dominated_omnivory
Calyptomena_viridis_NHMUK_s1969.1.70	0.204642973	Fruit
Todus_mexicanus_FMNH_351174	0.204826719	Grabbing/pecking_invertebrates
7 Spizella_arborea	0.208165659	SeedBeak-Finch
Phaethon_lepturus_NHMUK_1876.3.16.3	0.209527968	Piscivory
Aythya_ferina_NMHUK_1851.12.23.15	0.211541513	SeedGas
Caracara_cheriway_UMMZ_133664	0.212316867	Carnivory
Cathartes_burrovianus_UMMZ_227466	0.213028925	Carnivory
Streptoprocne_zonaris_FMNH_85767	0.216827377	Grabbing/pecking_invertebrates
Treron_capellei_UMMZ_220454	0.217803149	Fruit
Corythaeota_cristata_FMNH_313066	0.21783187	Fruit
Caprimulgus_macrurus_FMNH_392245	0.219484167	Grabbing/pecking_invertebrates
Picus_viridis_NHMUK_NHMUK_S1982.5.1	0.219967171	Grabbing/pecking_invertebrates
Apaloderma_narino_FMNH_290897_	0.220642143	Grabbing/pecking_invertebrates
Crax_mitu_FMNH_320386	0.220689345	Fruit
Larus_novae-hollandiae_UMZC_274.C_	0.221074788	Animal-dominated_omnivory
Pelagodroma_marina_NHMUK_1895.7.1.163_ALL	0.222288789	Piscivory
Vultur_gryphus_NHMUK_S1955.5.11	0.222410843	Carnivory
Colinus_virginianus_FMNH_105065	0.222426089	SeedGas
Chordeiles_minor_UMMZ_233923	0.224436259	Grabbing/pecking_invertebrates
Odontophorous_guttatus_UMMZ_210631	0.226228023	SeedGas
Trogon_melanurus_FMNH_290496	0.228219502	Fruit
Elanus_caerulenus_NHMUK_1850.8.15.159	0.228252065	Carnivory
Puffinus_tenuirostris_NHMUK_1850.8.15.152	0.228715361	Piscivory
Sclerurus_mexicanus_FMNH_321715	0.22899574	Grabbing/pecking_invertebrates
Gavia_stellata_NHMUK 1891.7.20.132	0.229796299	Piscivory
1 Chloris_chloris	0.229916897	SeedBeak-Finch
Monias_benschi_NHMUK_1924.11.29.1	0.230493171	Grabbing/pecking_invertebrates
Hemiprocne_comata_UMMZ_158224	0.230694075	Grabbing/pecking_invertebrates
Rallus_limnicola_FMNH_501812	0.231829632	Omnivory
Anas_discors_NHMUK_S2001.41.5	0.235124737	SeedGas
Dendrocygna_bicolor_UMMZ_219885_	0.236200862	SeedGas
Colius_striatus_FMNH_384817	0.236941607	Fruit
Rupicola_peruviana_UMMZ_119210	0.237192696	Fruit
Sterna_hirundo_NHMUK_NHMUK_S_1975.65.4	0.238434965	Piscivory
Balearica_pavonina_NHMUK_1859.10.26.5_ROGER	0.238797134	Omnivory
2 Linheraptor	0.239179454	Mesozoic paraves
Oceanodroma_leucorhoa_NHMUK_S1953.3.10	0.23970984	Piscivory
3 Dilong	0.240101735	Mesozoic paraves
Strix_aluco_NHMUK_S2001.38	0.243840795	Carnivory
Phalacrocorax_albiventer_NHMUK_S_2012.36.1	0.244769447	Piscivory
Colius_macrourus_FMNH_368959_	0.247725237	Fruit
Bonasa_umbellus_FMNH_348972	0.251782165	Fruit
Tyto_alba_NHMUK_S1989.22.1_	0.256090611	Carnivory
Megalaima_chrysopogon_NHMUK_1850.8.15.28	0.257368517	Fruit
Chaetura_brachyrua_UMMZ_157689	0.257973493	Grabbing/pecking_invertebrates
7 Ichthyornis	0.258754678	Mesozoic paraves
Buteo_rufofuscus_NHMUK_1862.1.18.1	0.260485918	Carnivory
Psittrichas_fulgidus_YPM_141821	0.261966012	Fruit
4 Geospiza_fulginosa	0.264686084	SeedBeak-Finch
Micrastur_ruficollis_FMNH_330226	0.265127004	Carnivory
Accipiter_nisus_NHMUK_S1982.149.1	0.265277968	Carnivory
Eurypyga_helias_FMNH_317341	0.269983343	Animal-dominated_omnivory
Tringa_ochrophus_FMNH_368850	0.277501253	Probing_invertebrates
1 Sinornithosaurus	0.281089292	Mesozoic paraves
Ixobrychus_minutus_NHMUK_S_2007_61.1_	0.287153819	Grabbing/pecking_invertebrates
Nyctibius_griseus_UMMZ_136371	0.287532033	Grabbing/pecking_invertebrates
Topaza_pyra_FMNH_318845	0.291864861	Nectarivory
Haematopus_ostralegus_FMNH_363899	0.293942341	Probing_invertebrates
Choloroceryle_amazona_UMMZ_209261	0.299128612	Piscivory
Tigrisoma_lineatum_FMNH_105528	0.302417567	Grabbing/pecking_invertebrates
Rynchops_niger_FMNH_376309	0.302787734	Piscivory
Phoeniculus_purpureus_FMNH_368956	0.30346748	Grabbing/pecking_invertebrates
Rostratula_benghalensis_FMNH_319933	0.306504747	Probing_invertebrates
Diomedea_irrorata_NHMUK_S1963.28.4	0.307768326	Piscivory
Anhinga_anhinga_FMNH_491374	0.30819163	Piscivory
Psittacus_erithacus_NHMUK_S1992.41.60_	0.309491415	SeedBeak-Parrot
Falco_sparverius_UMMZ_154452	0.310050115	Carnivory
Falco_sparverius_UMMZ_154462	0.310050115	Carnivory
Grus_leucogeranus_UMZC_344D	0.322629861	Omnivory
Barnardius_zonarius_NHMUK_S_1983.5.1	0.328178507	SeedBeak-Parrot
2 Cornuropsis_carolinensis	0.331288826	SeedBeak-Parrot
Neodrepanis_coruscans_FMNH_363807	0.333490511	Nectarivory
Galbula_dea_FMNH_376705_ALL_	0.335300637	Grabbing/pecking_invertebrates
Scopus_umbretta_FMNH_313701_	0.339485363	Carnivory
Sula_dactylatra_NHMUK_1890.11.3.10	0.344603824	Piscivory
Aramus_guarauna_FMNH_376078	0.344841022	Probing_invertebrates
Tockus_nasutus_NHMUK_S_1989.2.2	0.351129985	Grabbing/pecking_invertebrates
Bucorvus_abyssinicus_NHMUK_S2006.31.20_	0.35947367	Carnivory
Archilochus_colubris_FMNH_484738	0.361619104	Nectarivory
Ardea_alba_UMZC_338H	0.362369607	Piscivory
Fregata_aquila_NHMUK_1890.11.3.3	0.363103578	Piscivory
Phoenicopterus_roseus_UMZC_346B_ALL	0.366266686	Omnivory
Balaeniceps_rex_NHMUK_S1952.1.100	0.368732655	Piscivory
Recurvirostra_avosetta_NHMUk_S1962.10	0.378259276	Probing_invertebrates
Upupa_epops_FMNH_352821	0.379463474	Grabbing/pecking_invertebrates
Limosa_lapponica_NHMUK_S_1994.46	0.384023099	Probing_invertebrates
Deroptyus_accipitrinus_NHMUK_S2002.14.2	0.398737703	SeedBeak-Parrot
6 Paradoxornis	0.407823846	SeedBeak-Finch
Probosciger_aterriumus_NHMUK_S2006.15.5	0.420746526	SeedBeak-Parrot
Apteryx_australis_FMNH_391011	0.423169412	Probing_invertebrates
Leptoptilos_crumeniferus_NHMUK_S_1952.3.182	0.424108777	Carnivory
Rhamphastos_ambiguus_NHMUK_S2002.21	0.476135813	Fruit
Pelecanus_occidentalis_NHMUK_S1973.66.16	0.477668124	Piscivory
